# Supplementary material
Source: PubMed Central journal article supplement (PMC7424710)
Supplement: ao0c02838_si_001.pdf [file ao0c02838_si_001.pdf]

## Supporting Information

### **Fabrication of TiO<sub>2</sub>/Fe<sub>2</sub>O<sub>3</sub> core/shell nanostructure by pulse laser deposition toward stable and visible light photoelectrochemical water splitting**

Hao Lu,<sup>a\*</sup> Song Fang,<sup>a</sup> Jundie Hu,<sup>a</sup> Bo Chen,<sup>a</sup> Run Zhao,<sup>a</sup> Huishu Li,<sup>e</sup> Chang Ming Li<sup>a,b,c,d\*</sup> and Jinhua Ye<sup>f</sup>

a: Institute of Materials Science & Devices, Suzhou University of Science and Technology, Suzhou, 215009, China.

b: Jiangsu Key Laboratory of Micro and Nano Heat Fluid Flow Technology and Energy Application, School of Environmental Science and Engineering, Suzhou University of Science and Technology, Suzhou 215009, China.

c: Institute of Advanced Cross-field Science and College of Life Science, Qingdao University, Qingdao, Qingdao 200671, P.R. China.

d: Institute for Clean Energy & Advanced Materials, Southwest University, Chongqing, 400715 P. R. China.

e: Center for Soft Condensed Matter Physics & Interdisciplinary Research, College of Physics, Optoelectronics and Energy, Soochow University, Suzhou 215006, China.

f: International Center for Materials Nanoarchitectonics (WPI-MANA), National Institute for Materials Science (NIMS), 1-1 Namiki, Tsukuba, Ibaraki 305-0044, Japan.

Email: [ecmli@swu.edu.cn](mailto:ecmli@swu.edu.cn), [luhaoshaobo@163.com](mailto:luhaoshaobo@163.com)

\*Corresponding author

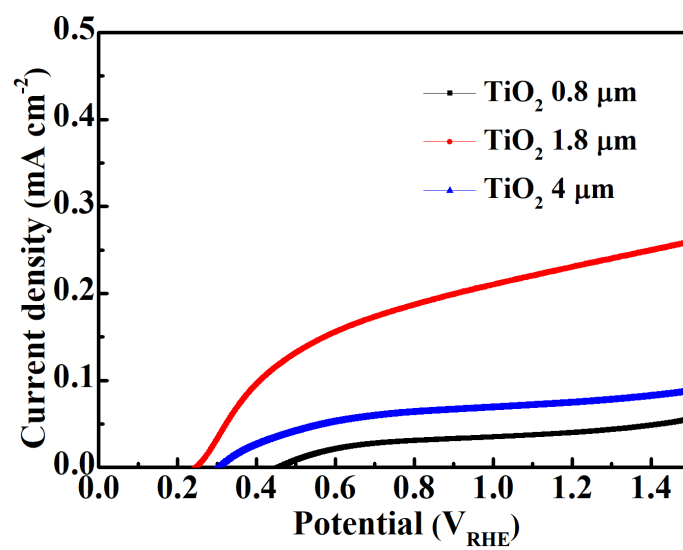

**Figure S1** *J-V* curves of different TiO<sub>2</sub> length.

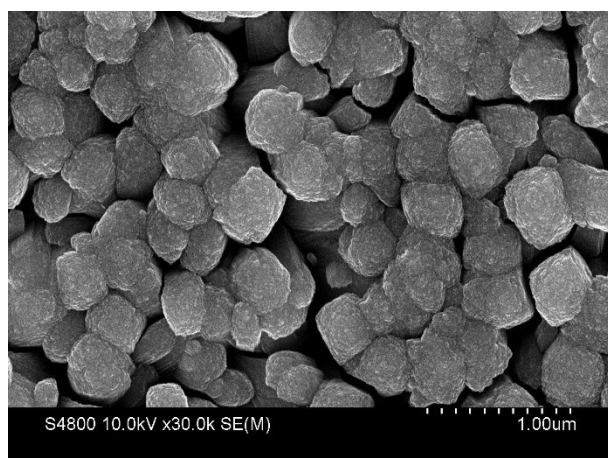

**Figure S2** SEM image of 30 min deposited sample.

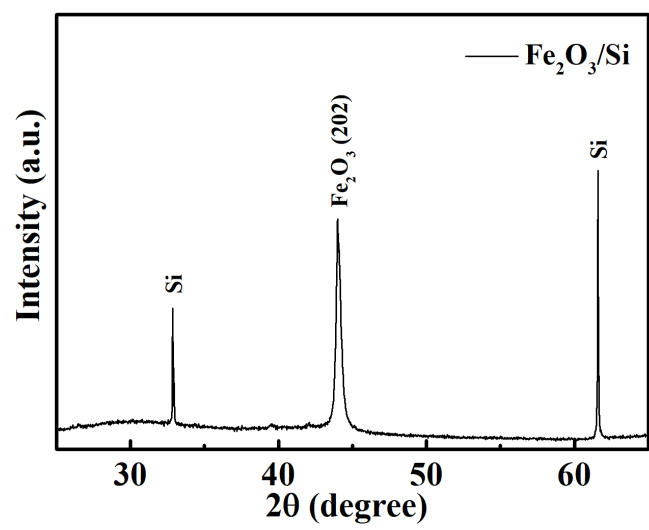

**Figure S3** XRD pattern of 7 min Fe<sub>2</sub>O<sub>3</sub>/Si sample.

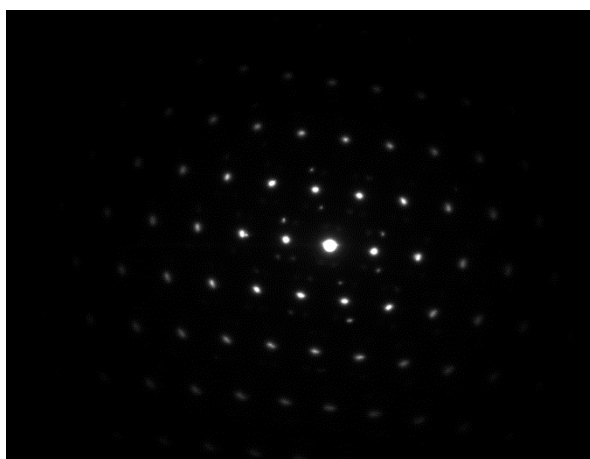

**Figure S4** SEAD image of TiO<sub>2</sub>/Fe<sub>2</sub>O<sub>3</sub> core/shell sample.

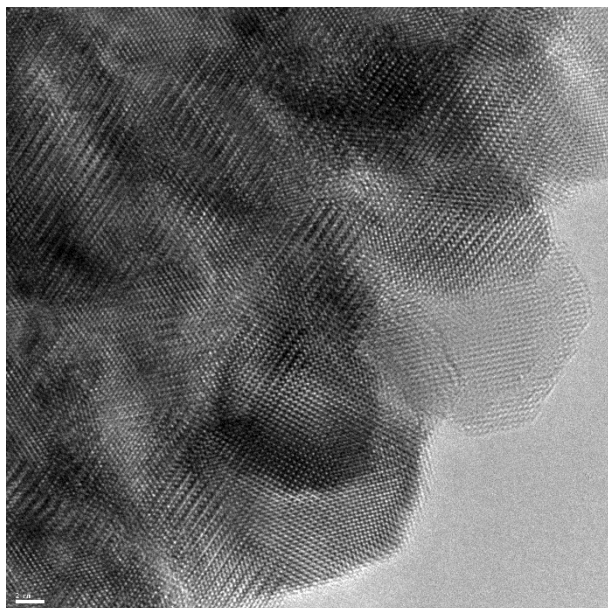

**Figure S5** TEM image of larger scale 7 min Fe<sub>2</sub>O<sub>3</sub> sample.

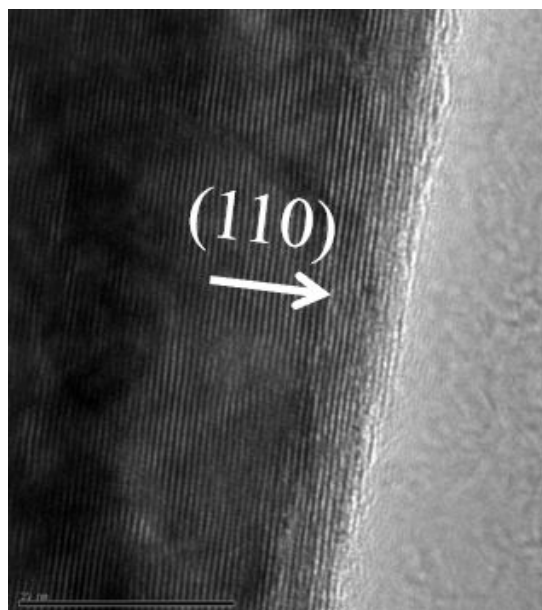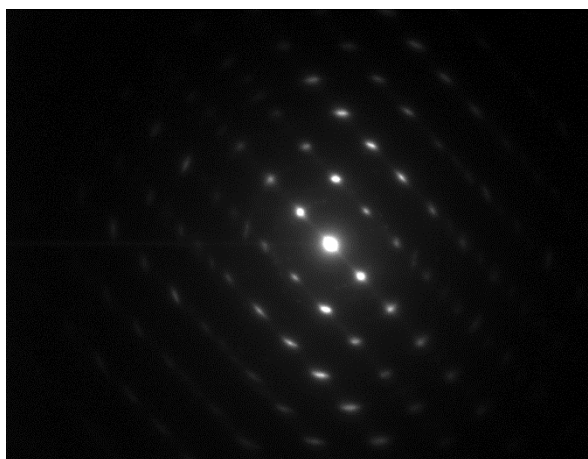

**Figure S6** TEM and SEAD images of plain-TiO<sub>2</sub> sample.

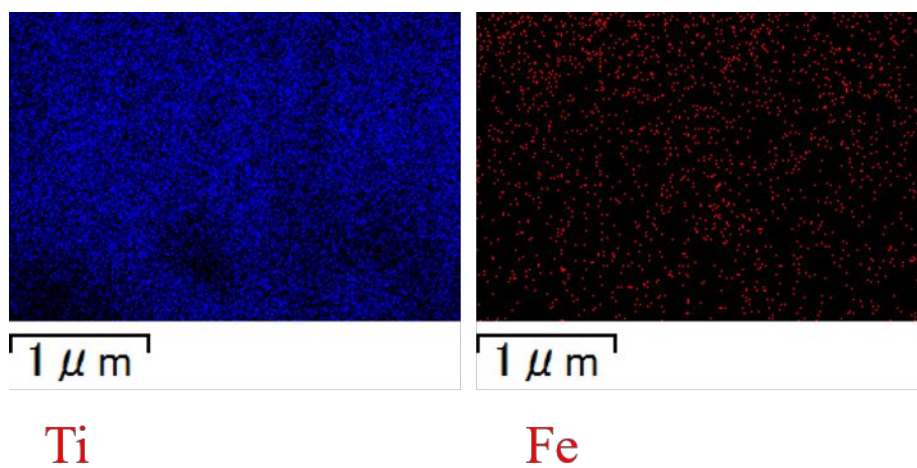

**Figure S7** SEM EDAX mapping of TiO<sub>2</sub>/7 min Fe<sub>2</sub>O<sub>3</sub> sample.



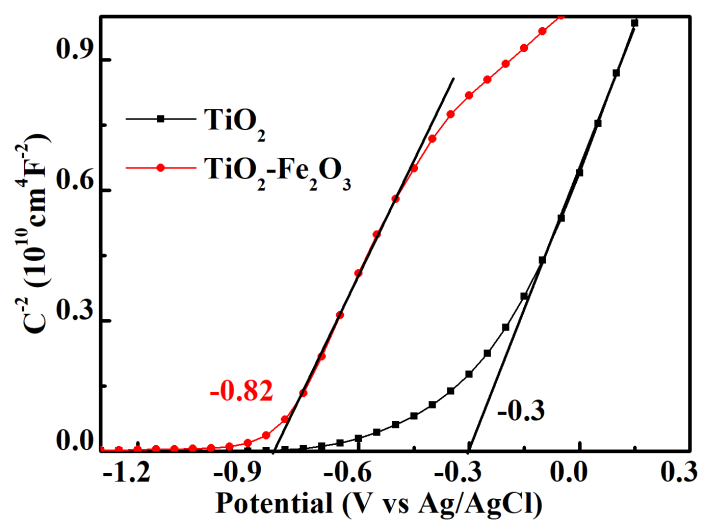

**Figure S8** M-S curves of  $\text{TiO}_2$  and  $\text{TiO}_2/7 \text{ min Fe}_2\text{O}_3$  samples.

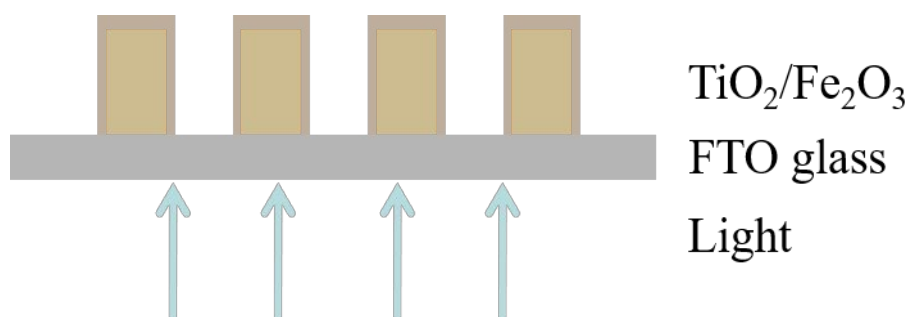

**Figure S9** Schematic illustration of photoanodes with the order of light source/FTO/ $\text{TiO}_2/\text{Fe}_2\text{O}_3$ .

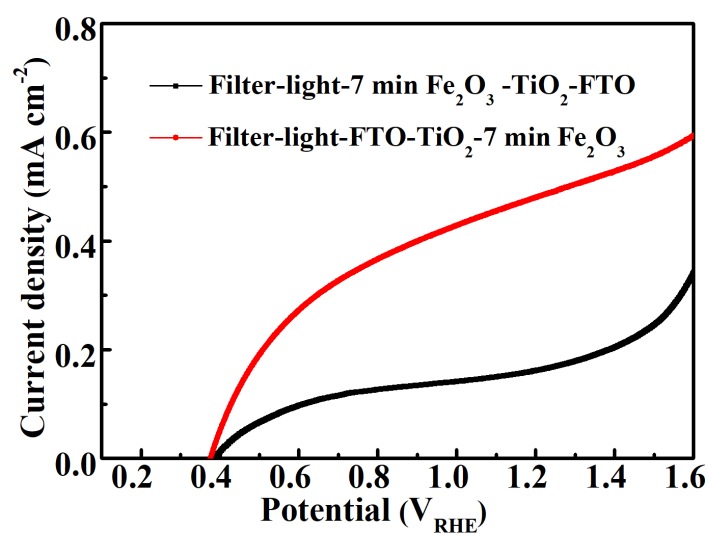

**Figure S10** *J-V* curves of different side samples with 400 nm filter.

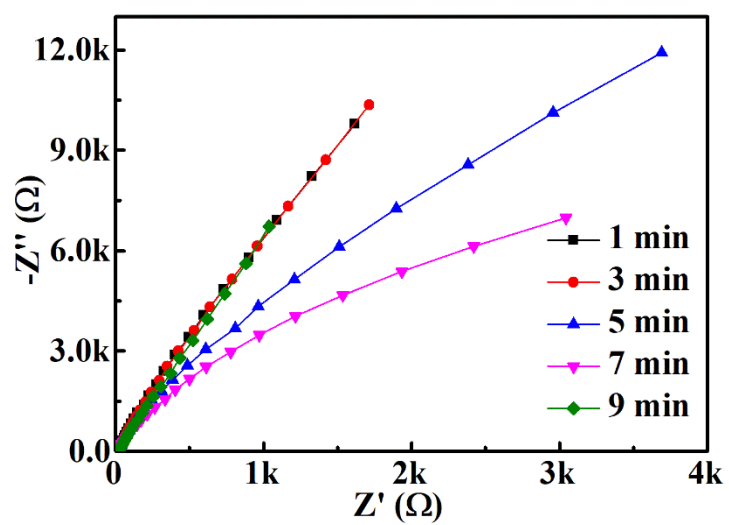

**Figure S11** Nyquist plots of different deposited  $\text{Fe}_2\text{O}_3$  time.

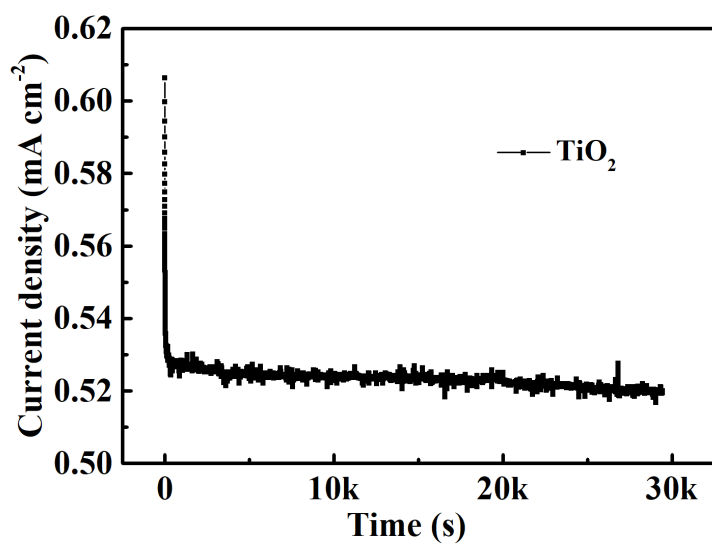

**Figure S12** Long time measurement of TiO<sub>2</sub> sample.

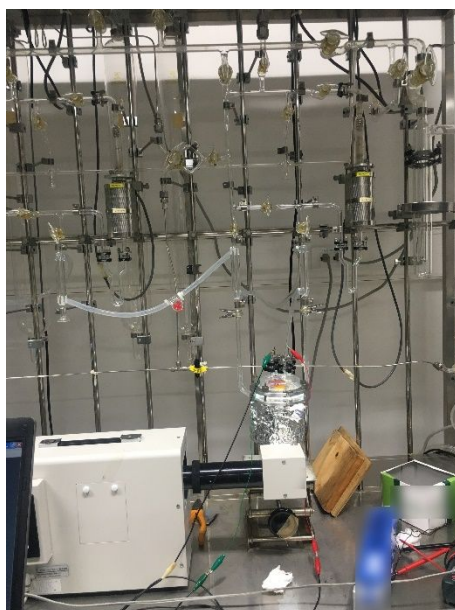

**Figure S13** The photo of gasses collection and detection system in our lab(Photograph courtesy of Hao Lu).

| Element | App<br>Conc. | Intensity<br>Corrn. | Weight% | Weight%<br>Sigma | Atomic% |
|---------|--------------|---------------------|---------|------------------|---------|
| O K     | 0.26         | 0.9478              | 48.17   | 0.46             | 74.04   |
| Ti K    | 0.22         | 0.8661              | 42.96   | 0.42             | 22.06   |
| Fe L    | 0.02         | 0.3382              | 8.87    | 0.72             | 3.91    |
| Totals  |              |                     | 100.00  |                  |         |

**Table S1** All elements analyzed (Normalized) of TiO<sub>2</sub>/Fe<sub>2</sub>O<sub>3</sub> sample.
